# Supplementary material
Source: publisher figshare collection journal article supplement (https://sage.figshare.com/ndownloader/files/35735017)
Supplement: Supplementary file 1 [file 35735017]

* Encoding: UTF-8.
*RECODING CONFIDENCE QUESTIONS

DATASET ACTIVATE DataSet1.
RECODE Conf.ICANN (1=0) (2=1) (3=2) (4=3) (5=4) (6=SYSMIS) (SYSMIS=SYSMIS) INTO Conf.ICANN.04Scale.
VARIABLE LABELS  Conf.ICANN.04Scale 'Confidence in ICANN overall'.
EXECUTE.

RECODE Conf.ICANN.04Scale (0=0) (1=0) (2=1) (3=2) (4=3) (SYSMIS=SYSMIS) INTO Conff.ICANN.03SCALE.
VARIABLE LABELS  Conff.ICANN.03SCALE 'Confidence in ICANN overall'.
EXECUTE.

*RECODING BACKGROUND VARIABLES

RECODE World.Region (1=1) (2=1) (3=0) (4=0) (5=1) (6=1) (7=1) (8=1) (9=1) (10=1)(11=0) (SYSMIS=SYSMIS) 
    INTO World.Region.Sub.Dom.
VARIABLE LABELS  World.Region.Sub.Dom 'World.Region.Global North and Global South'.
EXECUTE.

RECODE Language.Skills (1=0) (2=0) (3=1) (4=1) (5=1) INTO Language.Skills.Sub.Dom.
VARIABLE LABELS  Language.Skills.Sub.Dom 'Language skills advanced and no English'.
EXECUTE.

RECODE Age (1=1) (2=1) (3=0) (4=0) (5=0) (6=0) INTO Age.Sub.Dom.
VARIABLE LABELS  Age.Sub.Dom 'Older and younger-aged'.
EXECUTE.

RECODE Gender (1=1) (2=0) (ELSE=SYSMIS) INTO Gender.Sub.Dom.
VARIABLE LABELS  Gender.Sub.Dom 'Gender.Female.Male'.
EXECUTE.

RECODE Ethnicity (1=1) (2=1) (3=1) (4=1) (5=1) (6=0) (7=1) (ELSE=SYSMIS) INTO Ethnicity.Sub.Dom.
VARIABLE LABELS  Ethnicity.Sub.Dom 'Ethnicity white and non-white'.
EXECUTE.

*RECODINGPERCEPTIONS OF INEQUALITY

DATASET ACTIVATE DataSet1.
RECODE Geopol.Inequal (1=3) (2=2) (3=1) (4=0) (5=SYSMIS) (6=SYSMIS) (7=SYSMIS) (SYSMIS=SYSMIS) INTO 
    Geopol.Inequal.03SCALE.
VARIABLE LABELS  Geopol.Inequal.03SCALE 'Geopol inequality 0.3scale'.
EXECUTE.

RECODE Language.Inequal (1=3) (2=2) (3=1) (4=0) (5=SYSMIS) (6=SYSMIS) (7=SYSMIS) (SYSMIS=SYSMIS) 
    INTO Language.Inequal.03Scale.
VARIABLE LABELS  Language.Inequal.03Scale 'Language inequality 03 scale'.
EXECUTE.

RECODE Age.Inequal (1=3) (2=2) (3=1) (4=0) (5=SYSMIS) (6=SYSMIS) (7=SYSMIS) (SYSMIS=SYSMIS) INTO 
    Age.Inequal.03Scale.
VARIABLE LABELS  Age.Inequal.03Scale 'Age inequality 03 scale'.
EXECUTE.

RECODE Gender.Inequal (1=3) (2=2) (3=1) (4=0) (5=SYSMIS) (6=SYSMIS) (7=SYSMIS) (SYSMIS=SYSMIS) INTO 
    Gender.Inequal.03Scale.
VARIABLE LABELS  Gender.Inequal.03Scale 'Gender inequality 03 scale'.
EXECUTE.

RECODE Ethnic.Inequal (1=3) (2=2) (3=1) (4=0) (5=SYSMIS) (6=SYSMIS) (7=SYSMIS) (SYSMIS=SYSMIS) INTO 
    Ethnic.Inequal.03Scale.
VARIABLE LABELS  Ethnic.Inequal.03Scale 'Ethnic inequality 03 scale'.
EXECUTE.

*RECDING PERCEPTIONS OF PROBLEMATIC INEQUALITY (REC)

DO IF (Geopol.Inequal = 5 | Geopol.Inequal = 6 | Geopol.Inequal = 7).
RECODE Prob.Geopol.Inequal.REC (0=SYSMIS) (1=SYSMIS) (2=SYSMIS) (3=SYSMIS) (4=SYSMIS) (5=SYSMIS) 
    (6=SYSMIS).
END IF.
EXECUTE.

DO IF (Language.Inequal = 5 | Language.Inequal = 6 | Language.Inequal = 7).
RECODE Prob.Language.Inequal (0=SYSMIS) (1=SYSMIS) (2=SYSMIS) (3=SYSMIS) (4=SYSMIS) (5=SYSMIS) 
    (6=SYSMIS).
END IF.
EXECUTE.

DO IF (Age.Inequal = 5 | Age.Inequal = 6 | Age.Inequal = 7).
RECODE Prob.Age.Inequal.REC (0=SYSMIS) (1=SYSMIS) (2=SYSMIS) (3=SYSMIS) (4=SYSMIS) (5=SYSMIS) 
    (6=SYSMIS).
END IF.
EXECUTE.

DO IF (Gender.Inequal = 5 | Gender.Inequal = 6 | Gender.Inequal = 7).
RECODE Prob.Gender.Inequal.REC (0=SYSMIS) (1=SYSMIS) (2=SYSMIS) (3=SYSMIS) (4=SYSMIS) (5=SYSMIS) 
    (6=SYSMIS).
END IF.
EXECUTE.

DO IF (Ethnic.Inequal = 5 | Ethnic.Inequal = 6 | Ethnic.Inequal = 7).
RECODE Prob.Ethnic.Inequal.REC (0=SYSMIS) (1=SYSMIS) (2=SYSMIS) (3=SYSMIS) (4=SYSMIS) (5=SYSMIS) 
    (6=SYSMIS).
END IF.
EXECUTE.

*RECODING PERCEPTIONS OF PROBLEMATIC INEQUALITY (REC) INTO 04 SCALE

RECODE Prob.Geopol.Inequal.REC (1=0) (2=1) (3=2) (4=3) (5=4) (6=SYSMIS) (SYSMIS=SYSMIS) INTO 
    Prob.Geopol.Inequal.REC.04Scale.
VARIABLE LABELS  Prob.Geopol.Inequal.REC.04Scale 'Perceptions problematic geopolitical '+
    'inequality 04 scale'.
EXECUTE.

RECODE Prob.Language.Inequal.REC (1=0) (2=1) (3=2) (4=3) (5=4) (6=SYSMIS) (SYSMIS=SYSMIS) INTO 
    Prob.Langauge.Inequal.REC.04Scale.
VARIABLE LABELS  Prob.Langauge.Inequal.REC.04Scale 'Perceptions problematic language inequality'.
EXECUTE.

RECODE Prob.Age.Inequal.REC (1=0) (2=1) (3=2) (4=3) (5=4) (6=SYSMIS) (SYSMIS=SYSMIS) INTO 
    Prob.Age.Inequal.REC.04Scale.
VARIABLE LABELS  Prob.Age.Inequal.REC.04Scale 'Perceptions problematic age inequality 04 scale'.
EXECUTE.

RECODE Prob.Gender.Inequal.REC (1=0) (2=1) (3=2) (4=3) (5=4) (6=SYSMIS) (SYSMIS=SYSMIS) INTO 
    Prob.Gender.Inequal.REC.04Scale.
VARIABLE LABELS  Prob.Gender.Inequal.REC.04Scale 'Perceptions of problematic gender inequality '+
    '04 scale'.
EXECUTE.

RECODE Prob.Ethnic.Inequal.REC (1=0) (2=1) (3=2) (4=3) (5=4) (6=SYSMIS) (SYSMIS=SYSMIS) INTO 
    Prob.Ethnic.Inequal.REC.04Scale.
VARIABLE LABELS  Prob.Ethnic.Inequal.REC.04Scale 'Perceptions of problematic ethnic inequality 04 scale'.
EXECUTE.

* RECODING PERCEPTIONS OF PROBLEMATIC INEQUALITY (REC) 04SCALE ALL RESPONDENTS (RESPONDENTS WHO DO NOT SEE AN INEQUALITY GET A PROBLEMATICNESS SCORE OF 0)

DO IF (Geopol.Inequal = 4).
RECODE Prob.Geopol.Inequal.REC.04Scale.ALL (SYSMIS=0).
END IF.
EXECUTE.

DO IF (Language.Inequal = 4).
RECODE Prob.Language.Inequal.REC.04Scale.ALL (SYSMIS=0).
END IF.
EXECUTE.

DO IF (Age.Inequal = 4).
RECODE Prob.Age.Inequal.REC.04Scale.ALL (SYSMIS=0).
END IF.
EXECUTE.

DO IF (Gender.Inequal = 4).
RECODE Prob.Gender.Inequal.REC.04Scale.ALL (SYSMIS=0).
END IF.
EXECUTE.

DO IF (Ethnic.Inequal = 4).
RECODE Prob.Ethnic.Inequal.REC.04Scale.ALL (SYSMIS=0).
END IF.
EXECUTE.

* REC, purpose questions (04 scale, I do not know is item non response

RECODE Purpose.Tech.Functions (1=0) (2=1) (3=2) (4=3) (5=4) (6=SYSMIS) (SYSMIS=SYSMIS) INTO 
    Purpose.Tech.Functions.04Scale.
VARIABLE LABELS  Purpose.Tech.Functions.04Scale 'Purpose technical functions'.
EXECUTE.

RECODE Purpose.Global.Internet (1=0) (2=1) (3=2) (4=3) (5=4) (6=SYSMIS) (SYSMIS=SYSMIS) INTO 
    Purpose.Global.Internet.04Scale.
VARIABLE LABELS  Purpose.Global.Internet.04Scale 'Purpose.Global.Spread.04'.
EXECUTE.

*REC procedural questions

RECODE Princ.Incl.Part (1=0) (2=1) (3=2) (4=3) (5=4) (6=SYSMIS) (SYSMIS=SYSMIS) INTO 
    Princ.Incl.Part.04SCALE.
VARIABLE LABELS  Princ.Incl.Part.04SCALE 'Principle, inclusive part.'.
EXECUTE.

RECODE Princ.Transp (1=0) (2=1) (3=2) (4=3) (5=4) (6=SYSMIS) (SYSMIS=SYSMIS) INTO 
    Princ.Transp.04SCALE.
VARIABLE LABELS  Princ.Transp.04SCALE 'Principle,Transparency'.
EXECUTE.

RECODE Princ.Expertise (1=0) (2=1) (3=2) (4=3) (5=4) (6=SYSMIS) (SYSMIS=SYSMIS) INTO 
    Princ.Expertise.04SCALE.
VARIABLE LABELS  Princ.Expertise.04SCALE 'Principle.Expertise'.
EXECUTE.

RECODE Princ.Dem.DNS (1=0) (2=1) (3=2) (4=3) (5=4) (6=SYSMIS) (SYSMIS=SYSMIS) INTO 
    Princ.Dem.DNS.04SCALE.
VARIABLE LABELS  Princ.Dem.DNS.04SCALE 'Princ.Promote.DEM.DNS'.
EXECUTE.

RECODE Princ.Tech.Stab (1=0) (2=1) (3=2) (4=3) (5=4) (6=SYSMIS) (SYSMIS=SYSMIS) INTO 
    Princ.Tech.Stab.04SCALE.
VARIABLE LABELS  Princ.Tech.Stab.04SCALE 'Principle techncial stabiity'.
EXECUTE.

RECODE Princ.HR.DNS (1=0) (2=1) (3=2) (4=3) (5=4) (6=SYSMIS) (SYSMIS=SYSMIS) INTO 
    Princ.HR.DNS.04SCALE.
VARIABLE LABELS  Princ.HR.DNS.04SCALE 'Princ.HumanRights.DNS'.
EXECUTE.

RECODE Prac.Accountability (1=0) (2=1) (3=2) (4=3) (5=4) (6=SYSMIS) (ELSE=SYSMIS) INTO 
    Prac.Accountability.04Scale.
VARIABLE LABELS  Prac.Accountability.04Scale 'Accountability 04 Scale'.
EXECUTE.

*RECODING IN PRACTICE QUESTIONS

RECODE Prac.Tech.Stab (1=0) (2=1) (3=2) (4=3) (5=4) (6=SYSMIS) (ELSE=SYSMIS) INTO 
    Prac.Tech.Stab.04Scale.
VARIABLE LABELS  Prac.Tech.Stab.04Scale 'Technical stabiltiy 04 scale'.
EXECUTE.

*RECODING PERCEIVED PERSONAL BENEFIT

RECODE Pers.Benefit (1=0) (2=1) (3=2) (4=3) (5=4) (6=SYSMIS) (ELSE=SYSMIS) INTO Pers.Benefit04Scale.    
VARIABLE LABELS  Pers.Benefit04Scale 'Personal benefit 04 scale'.
EXECUTE.

*RECODING GLOBAL IDENTITY 

RECODE Glob.Identity (1=0) (2=1) (3=2) (4=3) (5=4) (6=SYSMIS) (ELSE=SYSMIS) INTO 
    Glob.Identity.04Scale.
VARIABLE LABELS  Glob.Identity.04Scale 'Global identity 04scale'.
EXECUTE.
